# Supplementary material
Source: Springer Nature journal article supplement (https://www.springermedizin.de/resource/supplementary/13063_2014_2329_MOESM2_ESM.pdf/9621930)

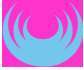

# FEMME - Example Patient Pathway

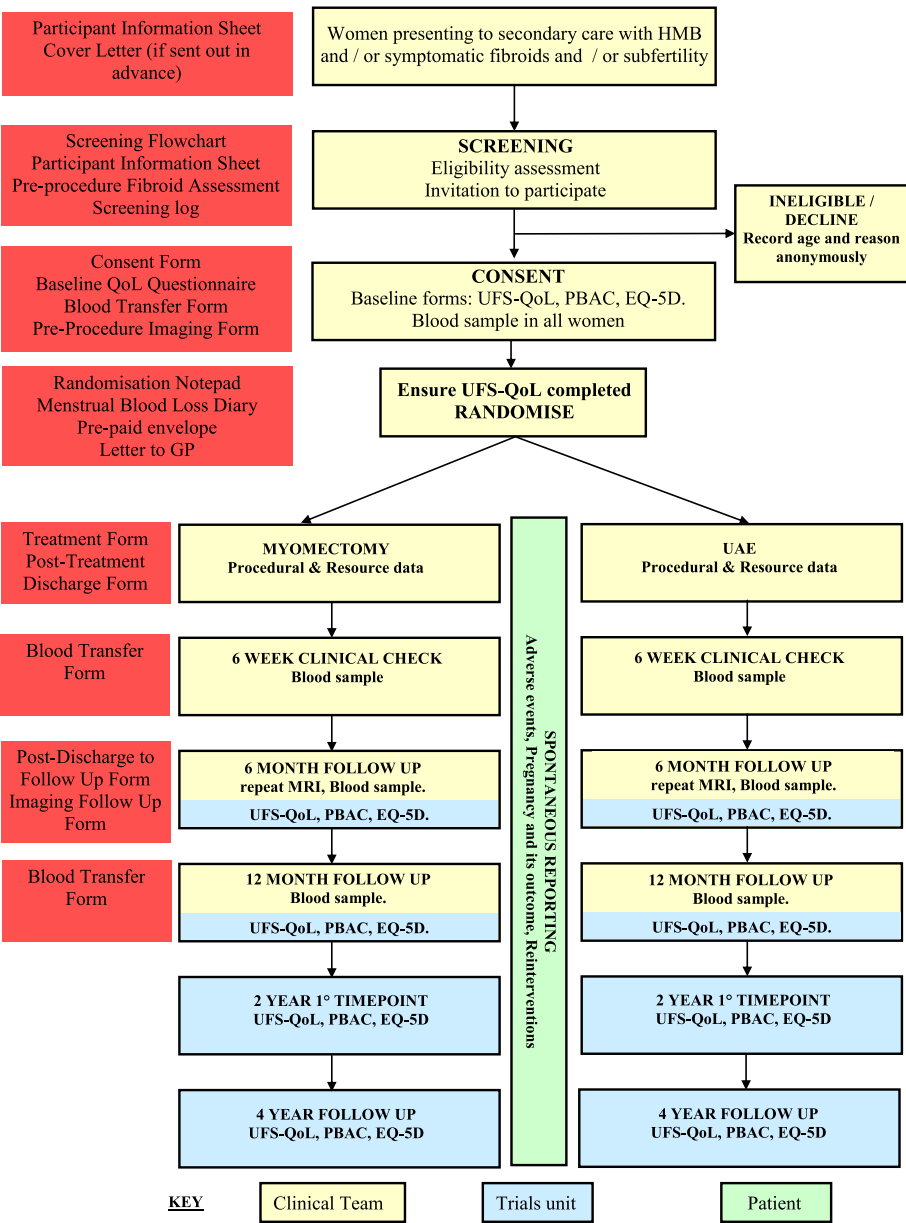

Supplement: MOESM2 [file 9621930]
